# Supplementary material
Source: MDPI journal article supplement (https://www.mdpi.com/2073-4344/11/10/1158)

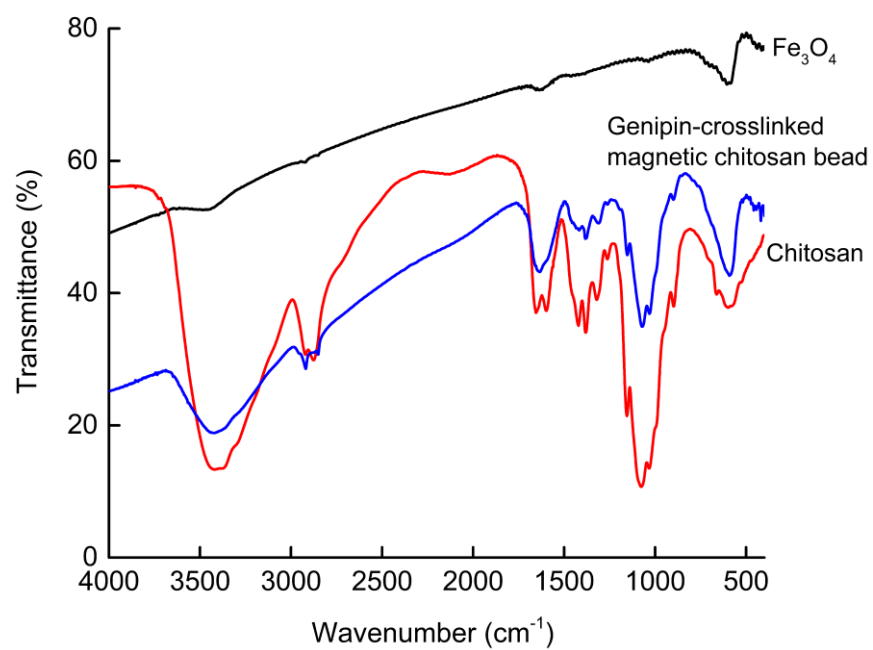

Figure S1. FTIR

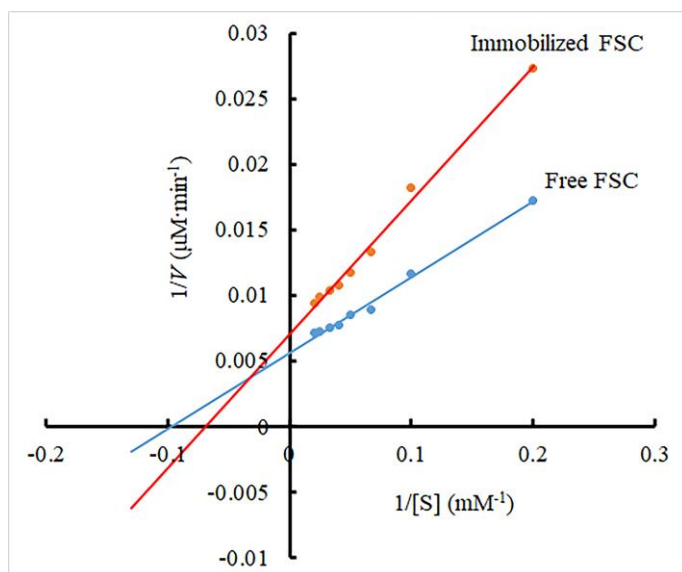

Figure S2. Lineweaver-Burk plots

Supplement: s1 [file s1]
